# Supplementary material
Source: PubMed Central journal article supplement (PMC384698)

UA versus AA Sterics

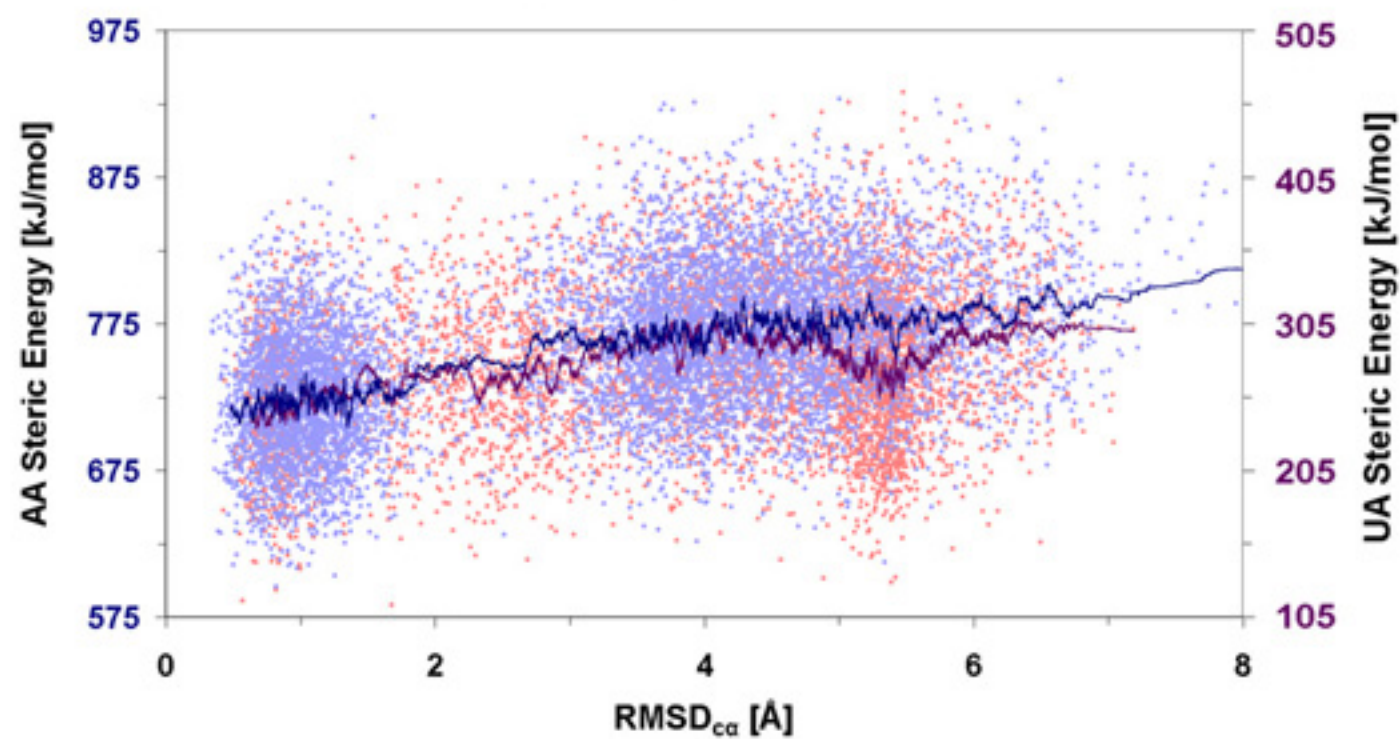

UA versus AA Electrostatics

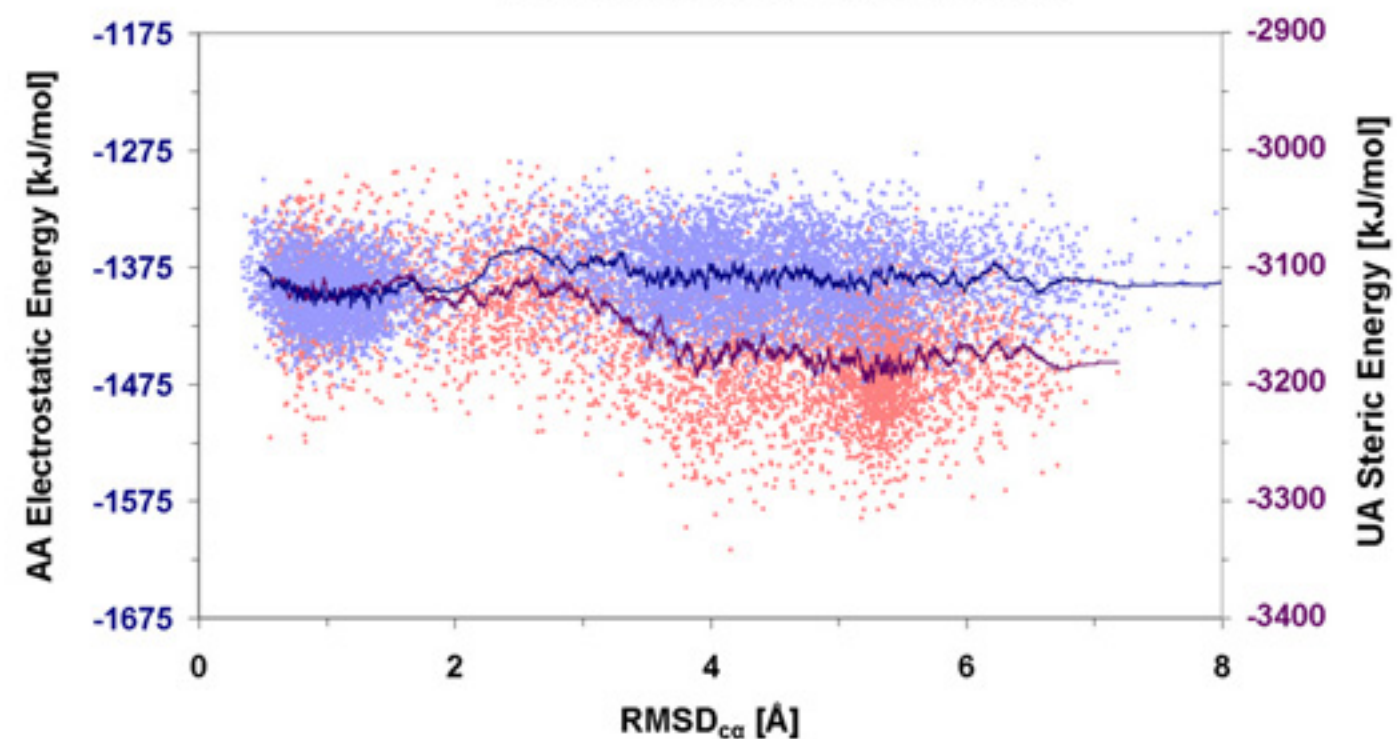

Electrostatic Interactions vs Solvation

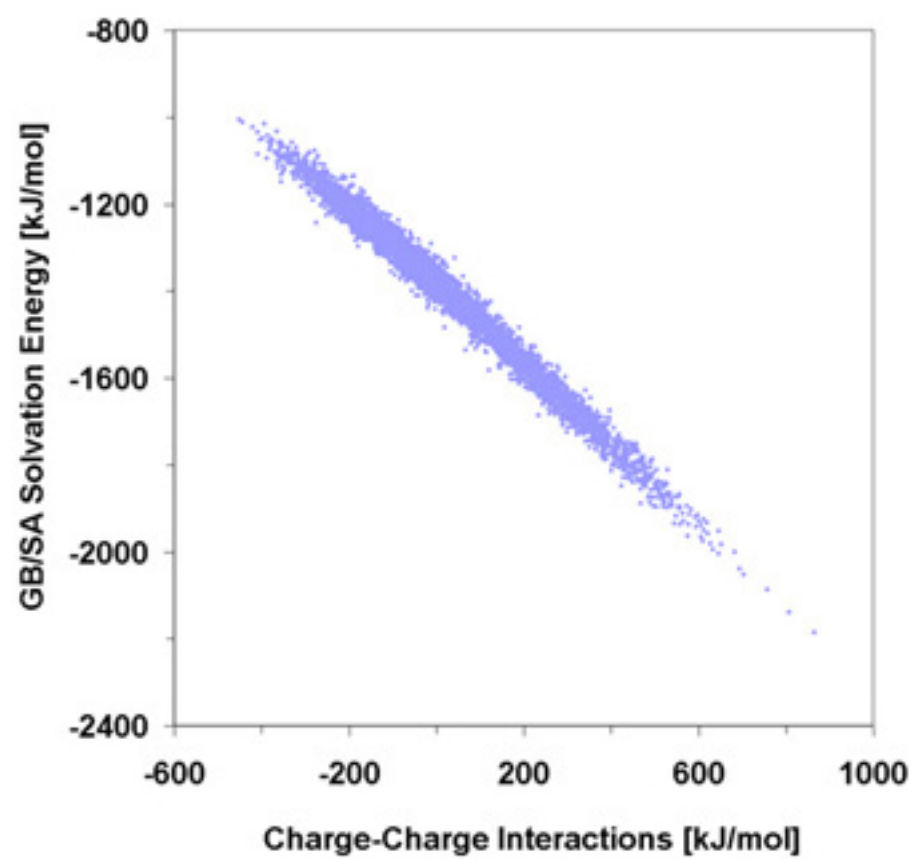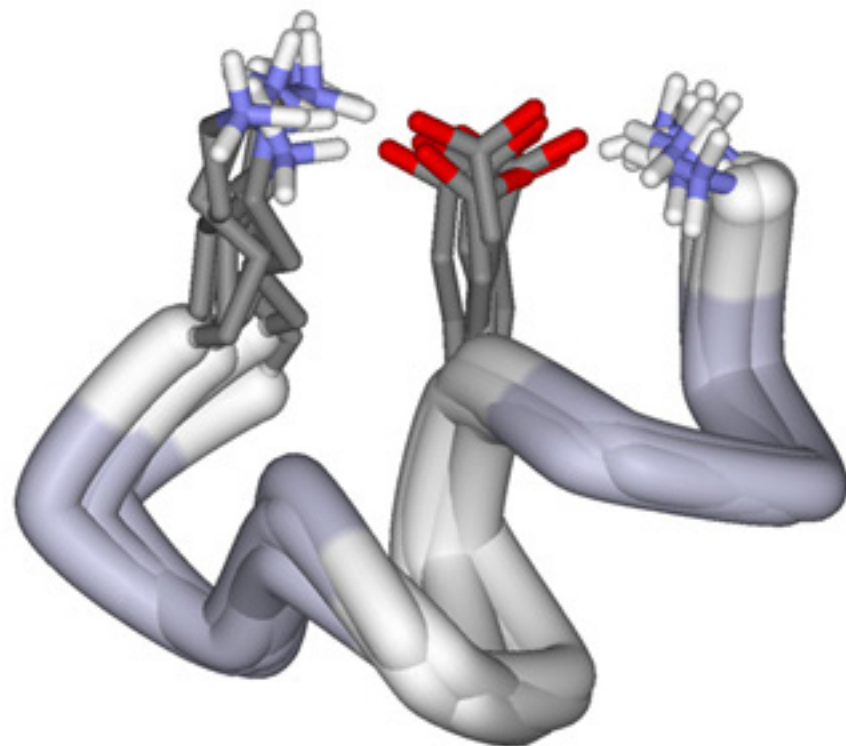

UA Charged Group Electrostatics

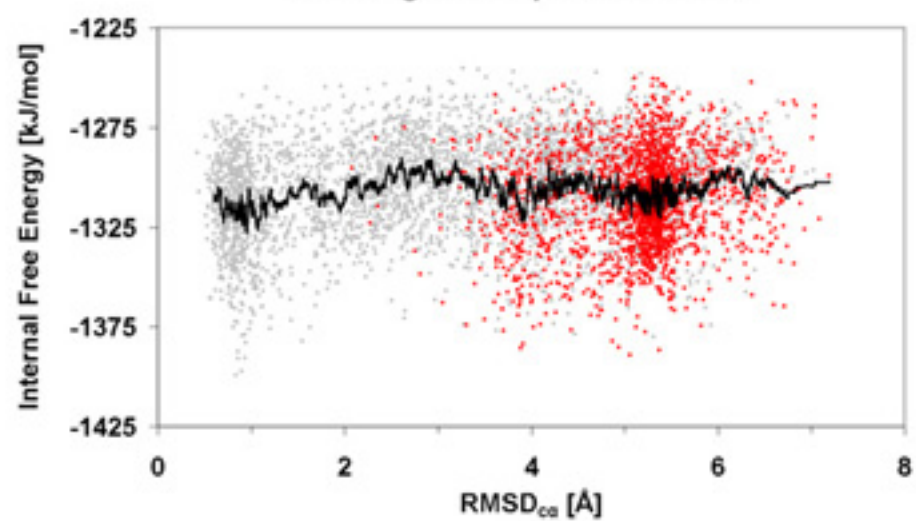

UA Backbone Electrostatics

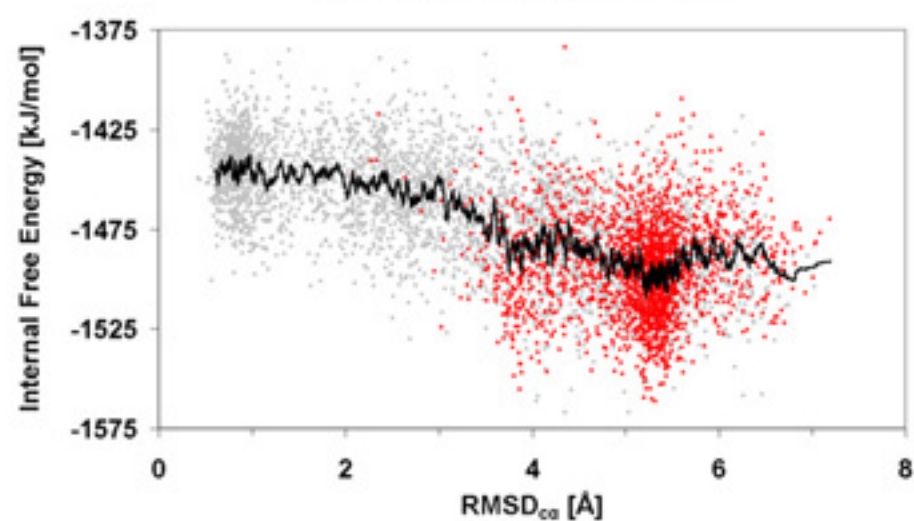

UA Neutral Side-Chain Electrostatics

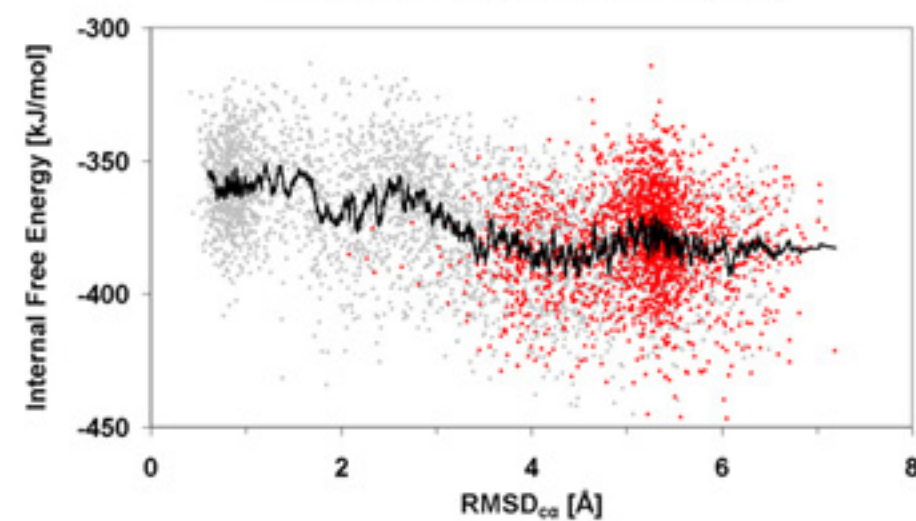

Supplement: pnas_101_12_4077__8.pdf [file pnas_101_12_4077__8.pdf]
