# Supplementary material
Source: PubMed Central journal article supplement (PMC384698)

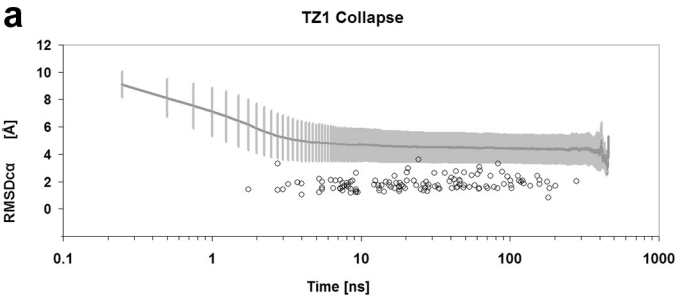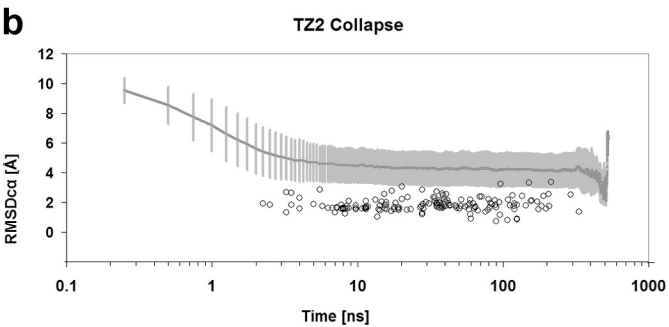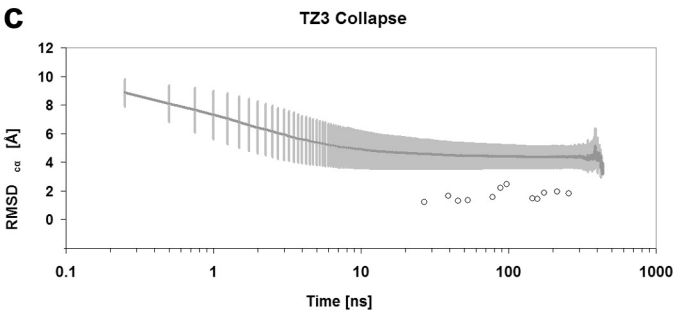

Supplement: pnas_101_12_4077__12.pdf [file pnas_101_12_4077__12.pdf]

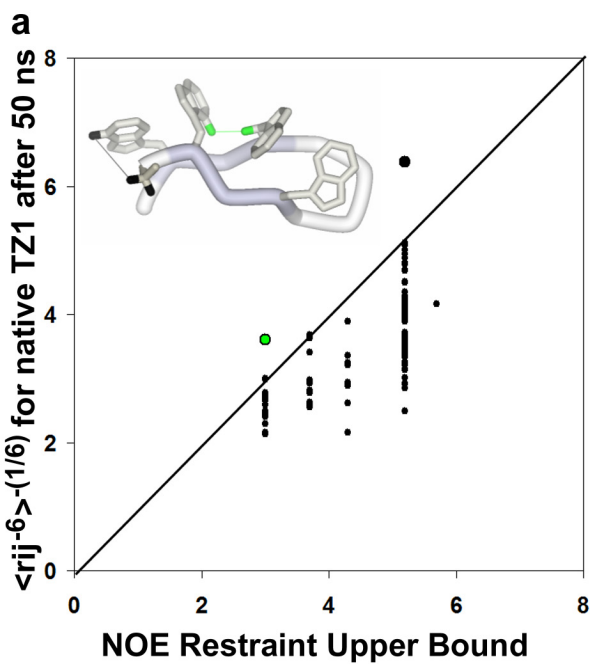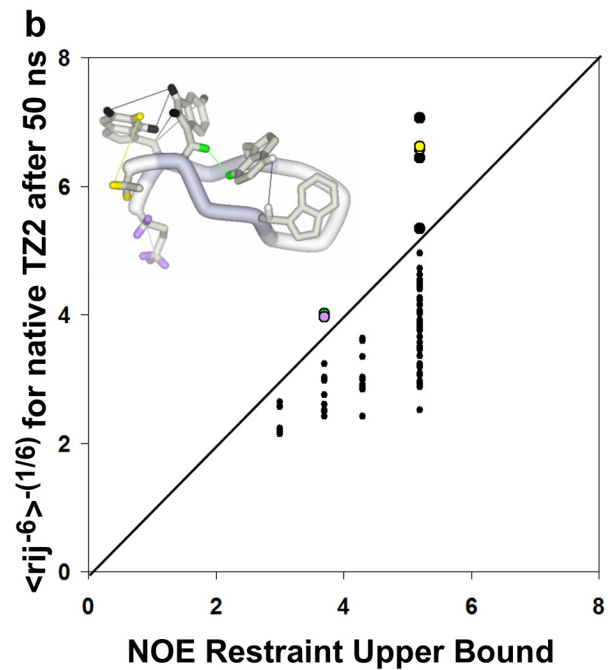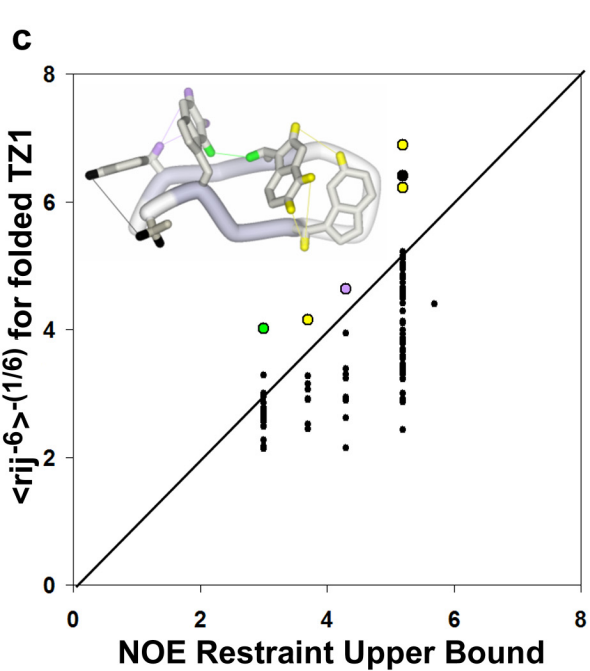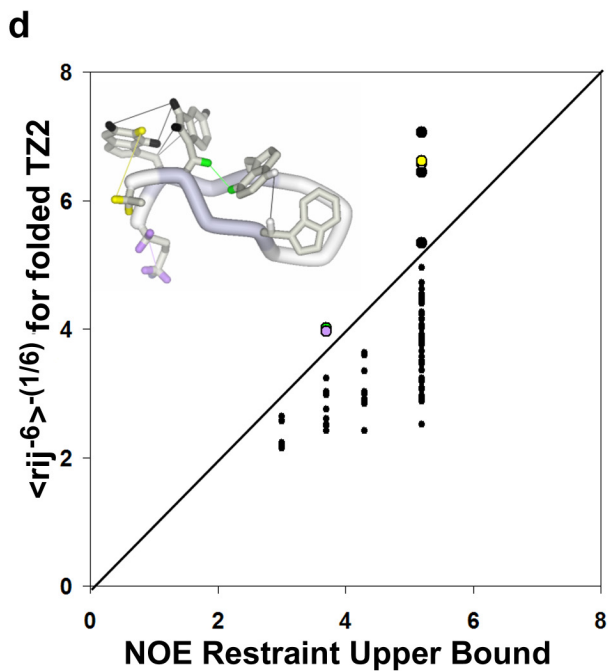

Supplement: pnas_101_12_4077__14.pdf [file pnas_101_12_4077__14.pdf]

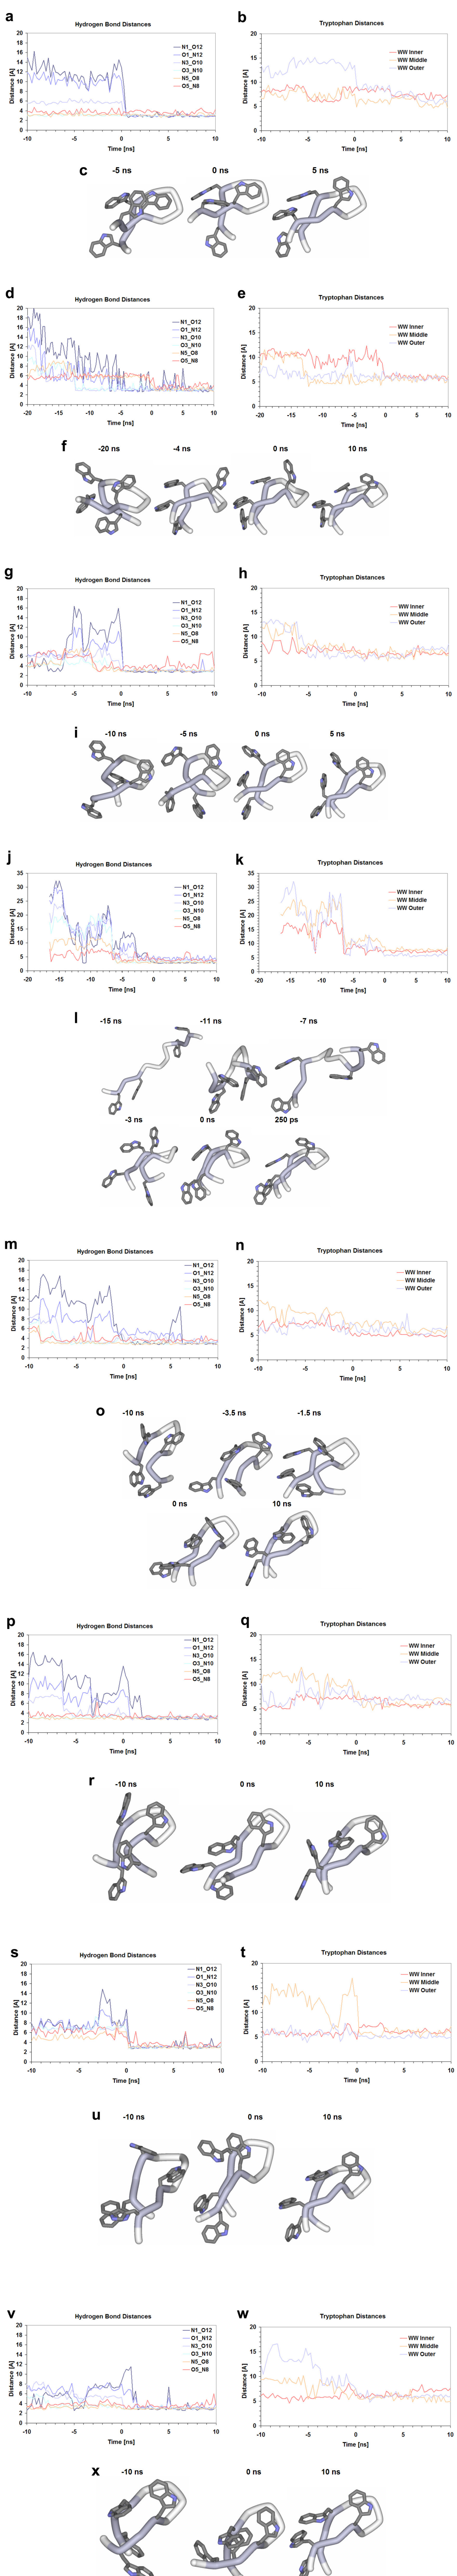

Supplement: pnas_101_12_4077__16.pdf [file pnas_101_12_4077__16.pdf]
